# Supplementary material
Source: publisher figshare collection journal article supplement (https://acs.figshare.com/ndownloader/files/4692859)
Supplement: Supplementary file 1 [file 4692859]

## Supporting Information

### **Inorganic Cluster Syntheses of $\text{TM}^{2+}$ -Doped Quantum Dots (CdSe, CdS, CdSe/CdS): Physical Property Dependence on Dopant Locale**

Paul I. Archer, Steven A. Santangelo, and Daniel R. Gamelin\*

*Contribution from the Department of Chemistry, University of Washington,  
Seattle, Washington 98195-1700*

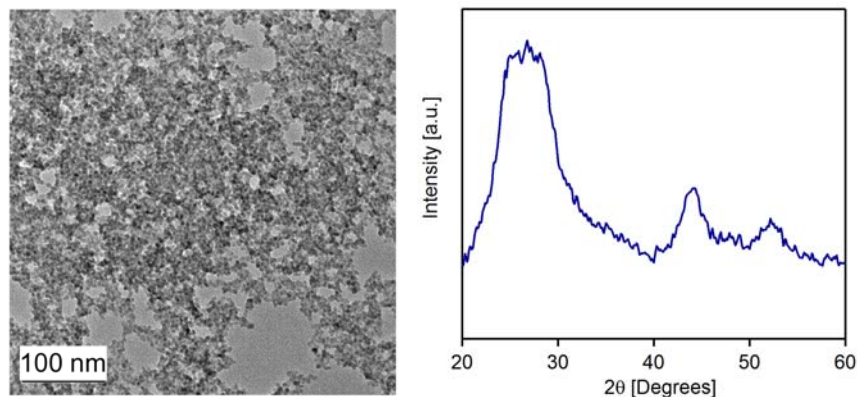

**Figure S1.** Overview TEM image and XRD data for the  $d \approx 4.6$  nm 1.5%  $\text{Co}^{2+}$ :CdS NCs described in the manuscript text.

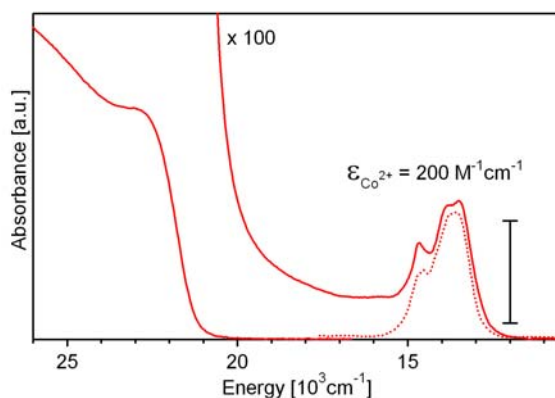

**Figure S2.** 300 K electronic absorption spectrum of a toluene suspension of the TOPO-capped  $d \approx 4.6$  nm 1.5%  $\text{Co}^{2+}$ :CdS nanocrystals described in the text. The excitonic transition of CdS at  $\sim 23\,000 \text{ cm}^{-1}$  and the  ${}^4\text{A}_2(\text{F}) \rightarrow {}^4\text{T}_1(\text{P})$  ligand-field transition of tetrahedral  $\text{Co}^{2+}$  ( $\sim 13\,600 \text{ cm}^{-1}$ ) are both observed. The bulk spectrum of  $\text{Co}^{2+}$ :CdS in the ligand field region is included for reference (adapted from ref. 1).

- (1) Weakliem, H. A., *J. Chem. Phys.* **1962**, *36*, 2117-2140.

\* To whom correspondence should be addressed (Email: [gamelin@chem.washington.edu](mailto:gamelin@chem.washington.edu)).
